# Supplementary material for: Disruption of CUL3-mediated ubiquitination causes proximal tubule injury and kidney fibrosis
Source: PubMed Central journal article supplement (PMC6418206; doi:10.1038/s41598-019-40795-0), 2019-03-14
Supplement: 41598_2019_40795_MOESM1_ESM.pdf [file 41598_2019_40795_MOESM1_ESM.pdf]

## **Disruption of CUL3-mediated ubiquitination causes proximal tubule injury and kidney fibrosis**

**Dr. Turgay Saritas, Dr. Catherina A. Cuevas, Dr. Mohammed Z. Ferdaus, Dr. Christoph Kuppe, Prof. Rafael Kramann, Prof. Marcus J. Moeller, Prof. Jürgen Floege<sup>2</sup>, Dr. Jeffrey D. Singer, Dr. James A. McCormick.**

**Supplementary Figure S1.** Related to Figure 1. *Cul3* disruption causes proximal tubule injury and apoptosis.

**Supplementary Figure S2.** Related to Figure 1. Histology of wild-type mice kidneys after ischemia/reperfusion injury (IRI).

**Supplementary Figure S3.** Related to Figure 3 and 4. Tubule injury, proliferation and apoptosis upon *Cul3* deletion.

**Supplementary Figure S4.** Coomassie-stained gels related to immunoblots shown in main manuscript.

**Supplementary Figure S5.** Uncropped Western blot gels shown in main manuscript Fig. 1 and Fig. 2.

**Supplementary Figure S6.** Uncropped Western blot gels shown in main manuscript Fig. 2.

**Supplementary Figure S7.** Uncropped Western blot gels shown in main manuscript Fig. 2, Fig. 3 and Fig 4.

**Supplementary Figure S8.** Uncropped Western blot gels shown in main manuscript Fig. 4 and Fig. 5.

**Supplementary Figure S9.** Uncropped Western blot gel shown in main manuscript Fig. 6.

**Supplementary Table S1.** List of reagents and resources used in this study.

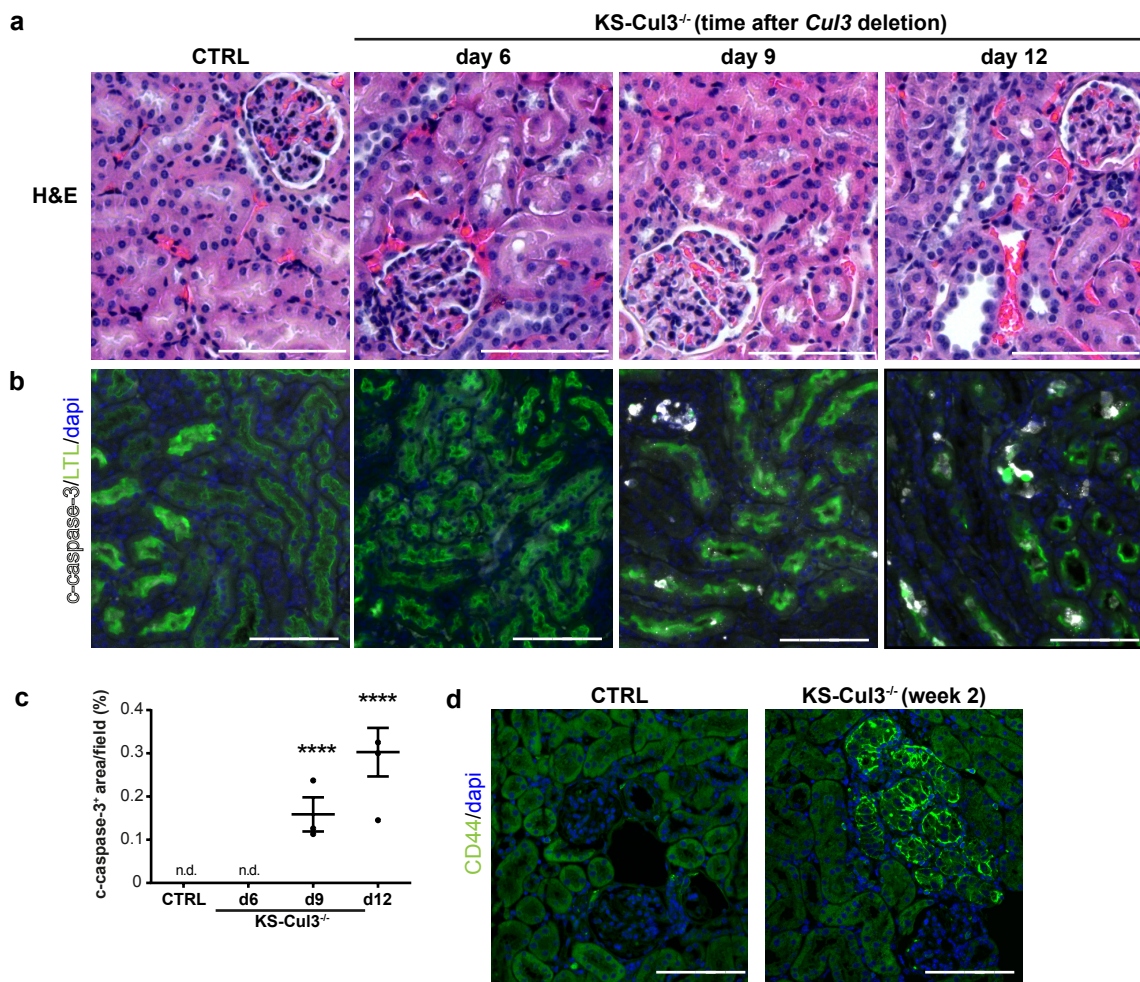

**Supplementary Figure S1. Related to Figure 1. *Cul3* disruption causes proximal tubule injury and apoptosis.**

(a) Haemotoxylin and Eosin (H&E) staining revealed no obvious morphological changes after 6, 9 and 12 upon *Cul3* deletion. (b, c) Immunofluorescence showed cleaved-caspase-3<sup>+</sup> apoptotic cells in LTL<sup>+</sup> proximal tubules after 9 and 12 days of *Cul3* deletion. (d) CD44 expression, which is generally absent, is markedly enhanced, particularly in injured proximal tubular epithelial cells upon 2 weeks of *Cul3* deletion. n = 3. Scale bars = 100 μm. Mean values are shown ± SEM. In (c) asterisks show significant differences between control and each KS-Cul3<sup>-/-</sup> mice group. \*\*\*\*P ≤ 0.0001; Ordinary one-way ANOVA with Dunnett's multiple comparisons test.



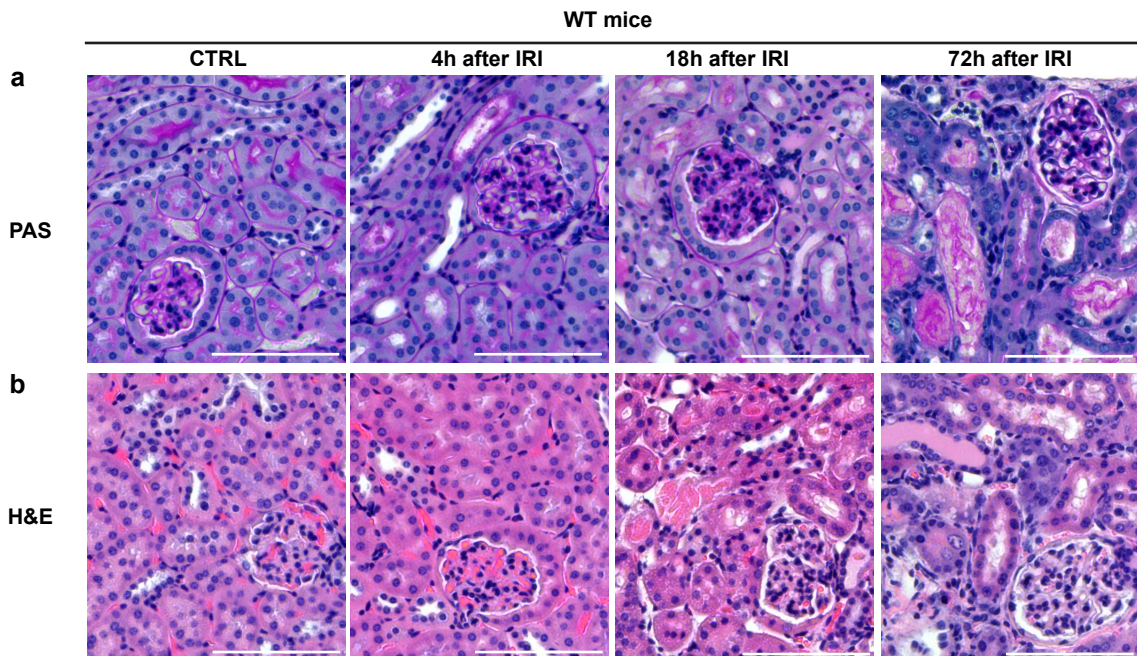

**Supplementary Figure S2. Related to Figure 1. Histology of wild-type mice kidneys after ischemia/reperfusion injury (IRI).**

(a, b) Periodic acid-Schiff (PAS) and Haematoxylin and Eosin (H&E) staining revealed obvious morphological changes (inflammation, proteinuria, cell casts, tubule atrophy) 18 hours and 72 hours after IRI. n = 2-3. Scale bars = 100  $\mu$ m.

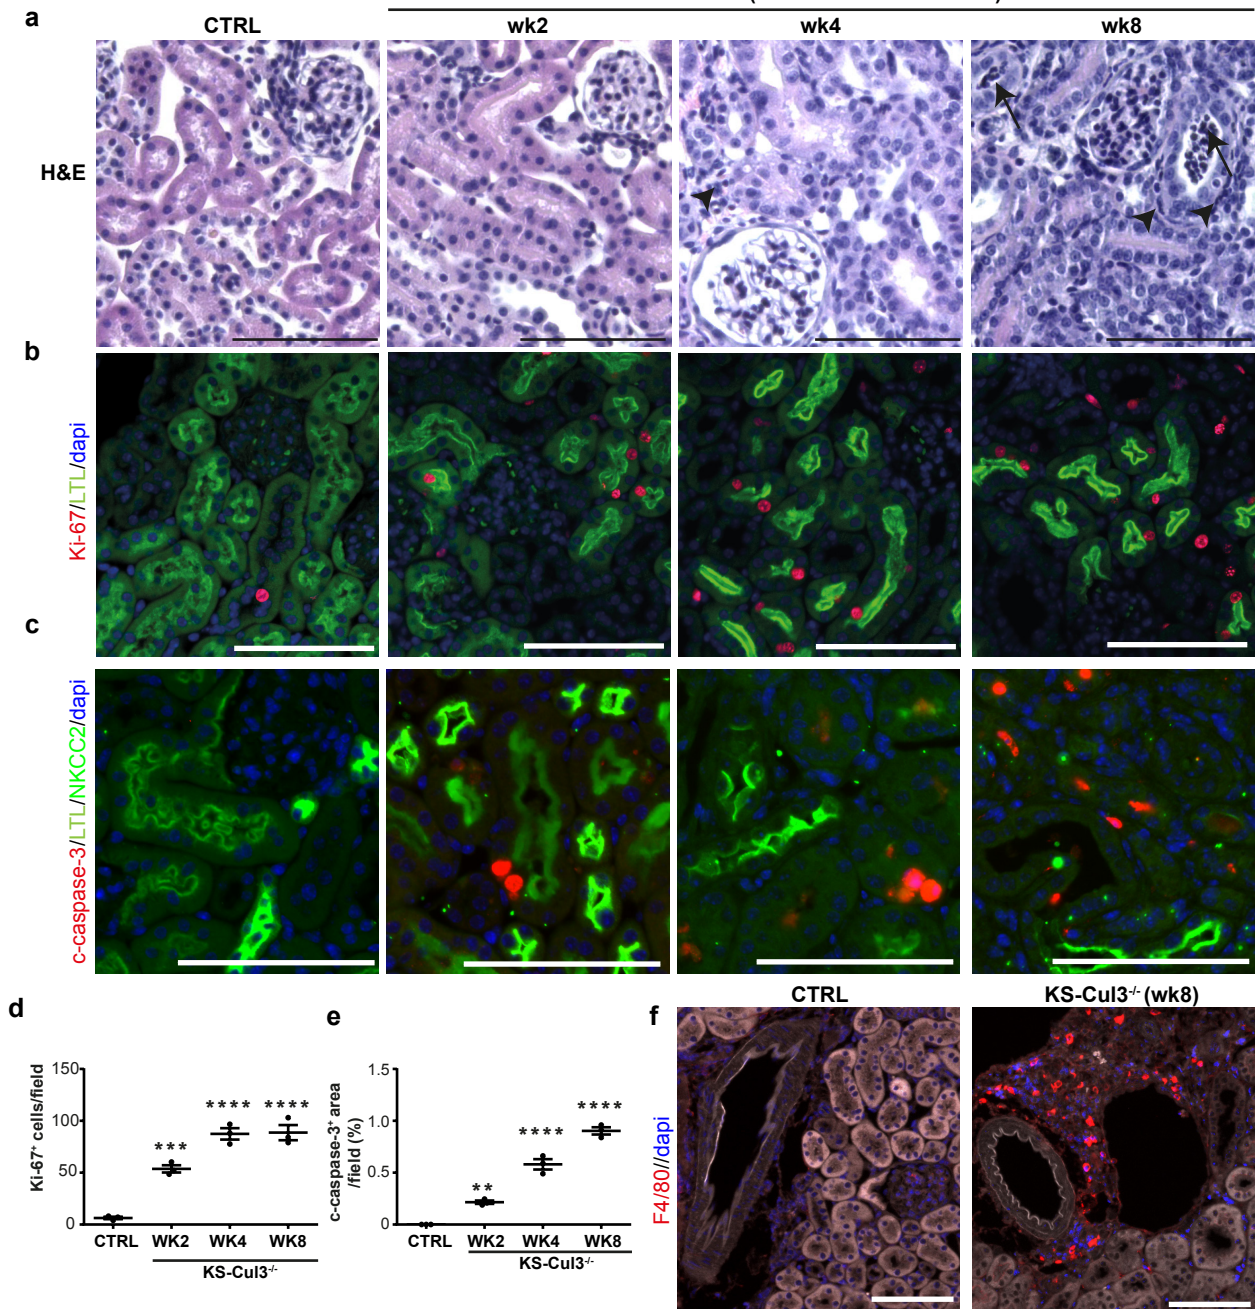

**Supplementary Figure S3. Related to Figure 3 and 4. Tubule injury, proliferation and apoptosis upon *Cul3* deletion.** (a) Haematoxylin and Eosin (H&E) staining revealed cellular infiltration (arrowheads) and dilated tubules with intratubular debris (arrows) upon *Cul3* disruption. (b) Immunofluorescence revealed increased overall number of Ki-67<sup>+</sup> proliferating cells in kidney sections from KS-Cul3<sup>-/-</sup> mice. Ki-67<sup>+</sup> cells were predominantly in LTL<sup>+</sup> proximal tubules and interstitium. (c) Cleaved-caspase-3<sup>+</sup> apoptotic cells were mainly found in LTL<sup>+</sup> proximal tubules two weeks after *Cul3* deletion. As an example, no apoptotic cells were found in more distal segments such as Na<sup>+</sup>-K<sup>+</sup>-Cl<sup>-</sup> cotransporter (NKCC2)<sup>+</sup> thick ascending limb. At later time points, apoptotic cells were also found in LTL<sup>-</sup> tubules. These tubules might represent injured proximal tubules without brush border and/or more distal tubules with apoptotic intratubular debris. (d) quantification of (b). (e) quantification of (c). (f) Perivascular infiltration of F4/80<sup>+</sup> macrophages upon *Cul3* deletion. n = 3. Scale bars = 100 μm. Mean values are shown ± SEM. In (d, e) asterisks show significant differences between control and each KS-Cul3<sup>-/-</sup> mice group. \*\*\*P ≤ 0.001, \*\*\*\*P ≤ 0.0001; Ordinary one-way ANOVA with Dunnett's multiple comparisons test.



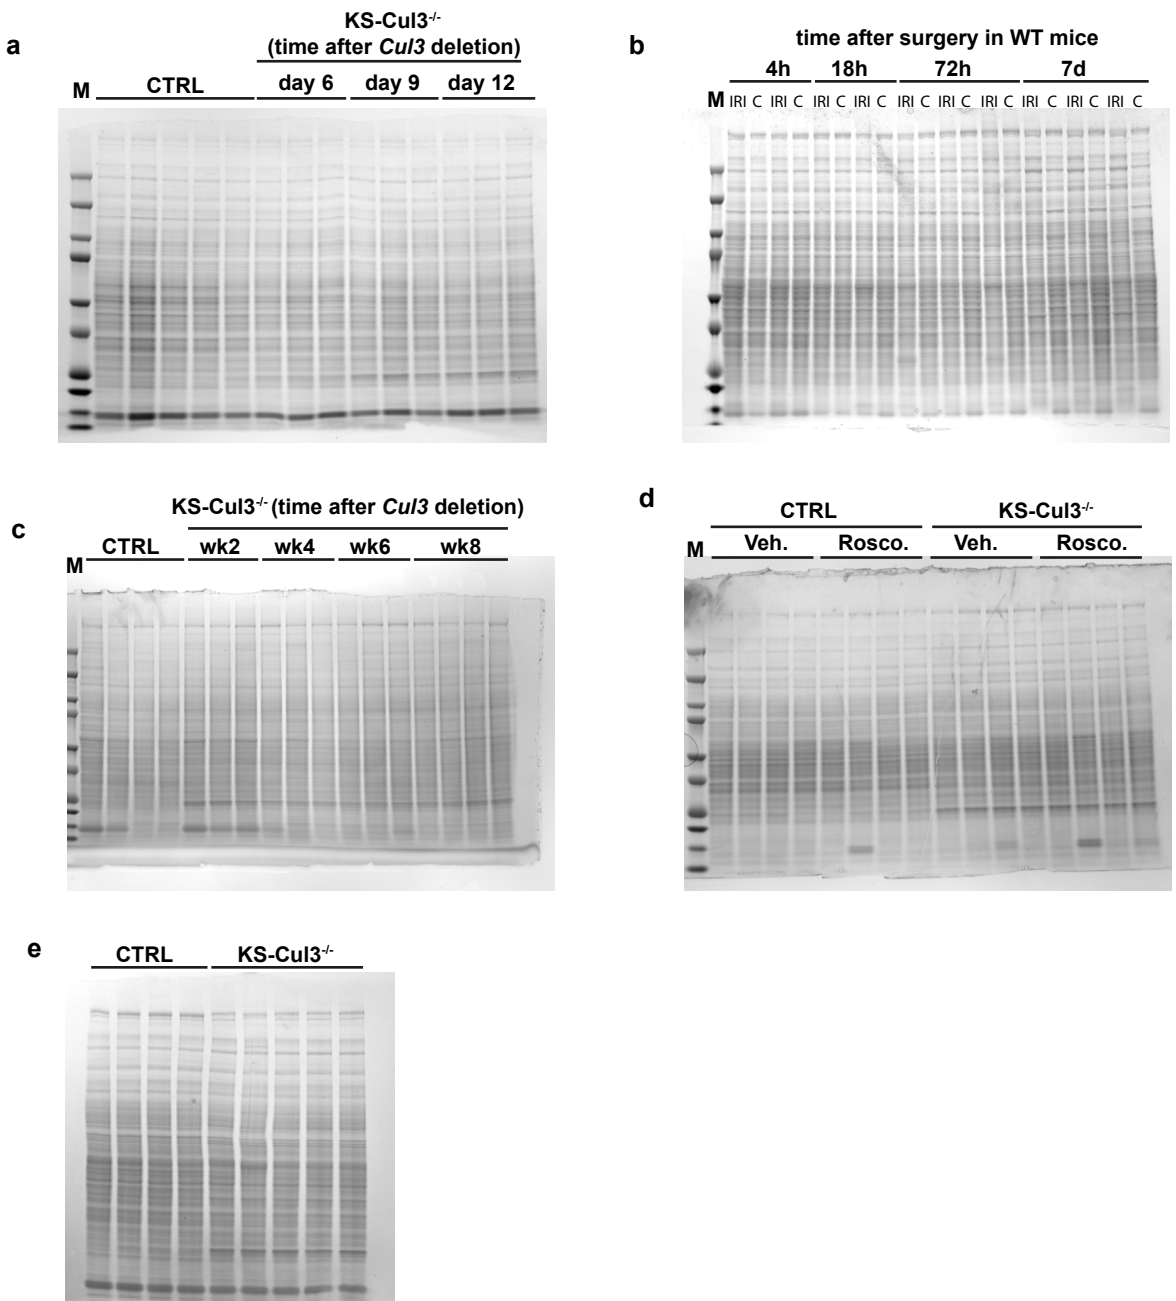

**Supplementary Figure S4. Coomassie-stained gels related to immunoblots shown in main manuscript. (a)** Coomassie gel related to Figs. 1a and 2a. Samples loaded on first and second lane were not used for immunoblots. **(b)** Coomassie gel related to Fig. 2g. **(c)** Coomassie gel related to Figs. 3a and 4a. Samples loaded on first and last lane as well as *Cul3* knockout mice on week 6 were not used for immunoblots. **(d)** Coomassie gel related to Fig. 5b. **(e)** Coomassie gel related to Fig. 6h. Abbreviation: M, marker (Precision Plus Protein™ Kaleidoscope™ Prestained Protein Standards); CTRL, control; KS-Cul3<sup>-/-</sup>, kidney-specific *Cul3* knockout mice; WT, wild-type, wk, week; Veh., vehicle; Rosco., roscovitine

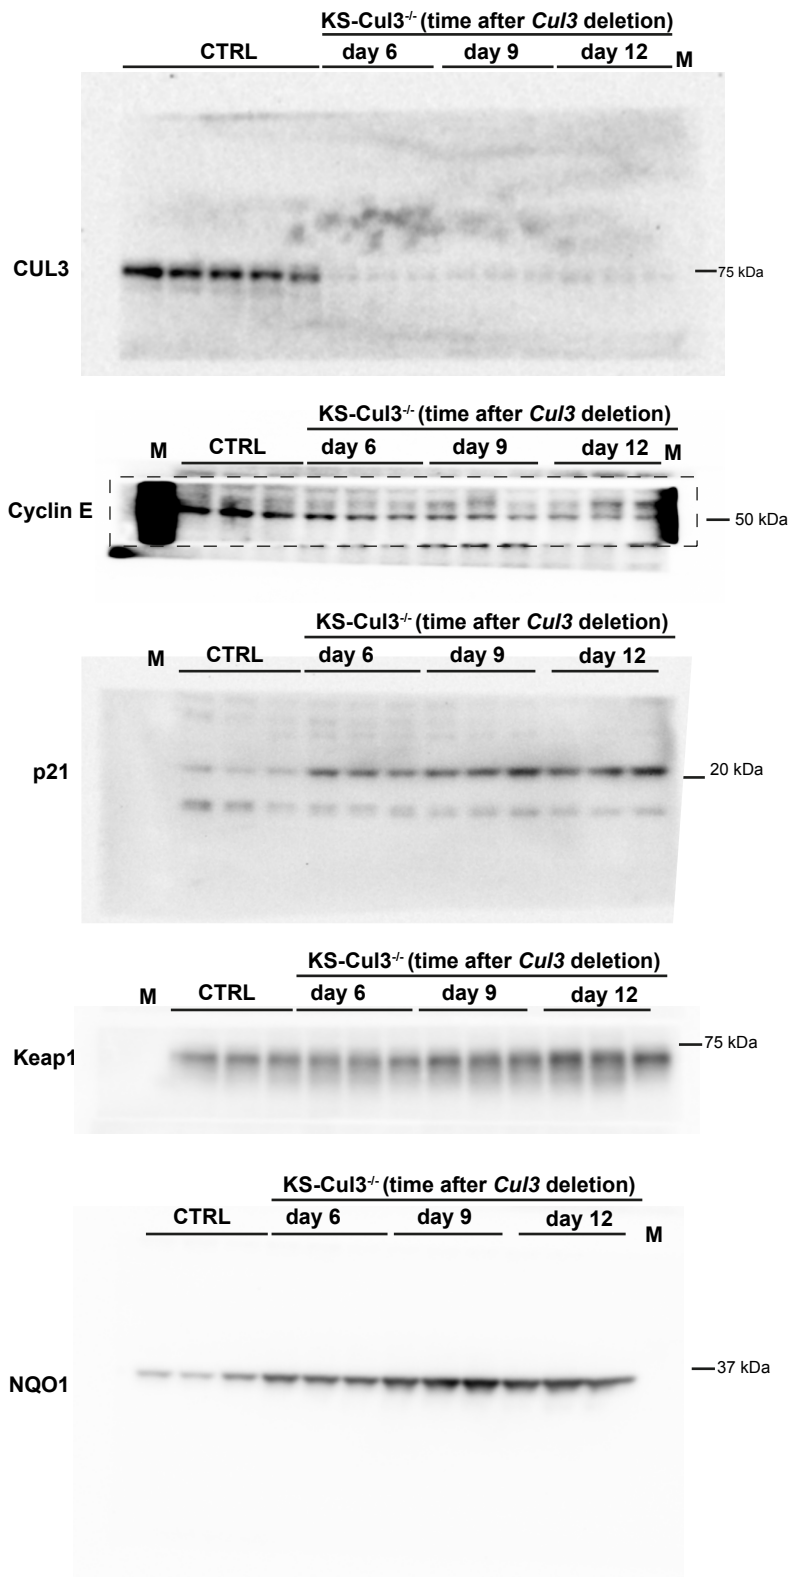

**Supplementary Figure S5. Uncropped Western blot gels shown in main manuscript Fig. 1 and 2. M, marker (Precision Plus Protein™ Kaleidoscope™ Prestained Protein Standards).**



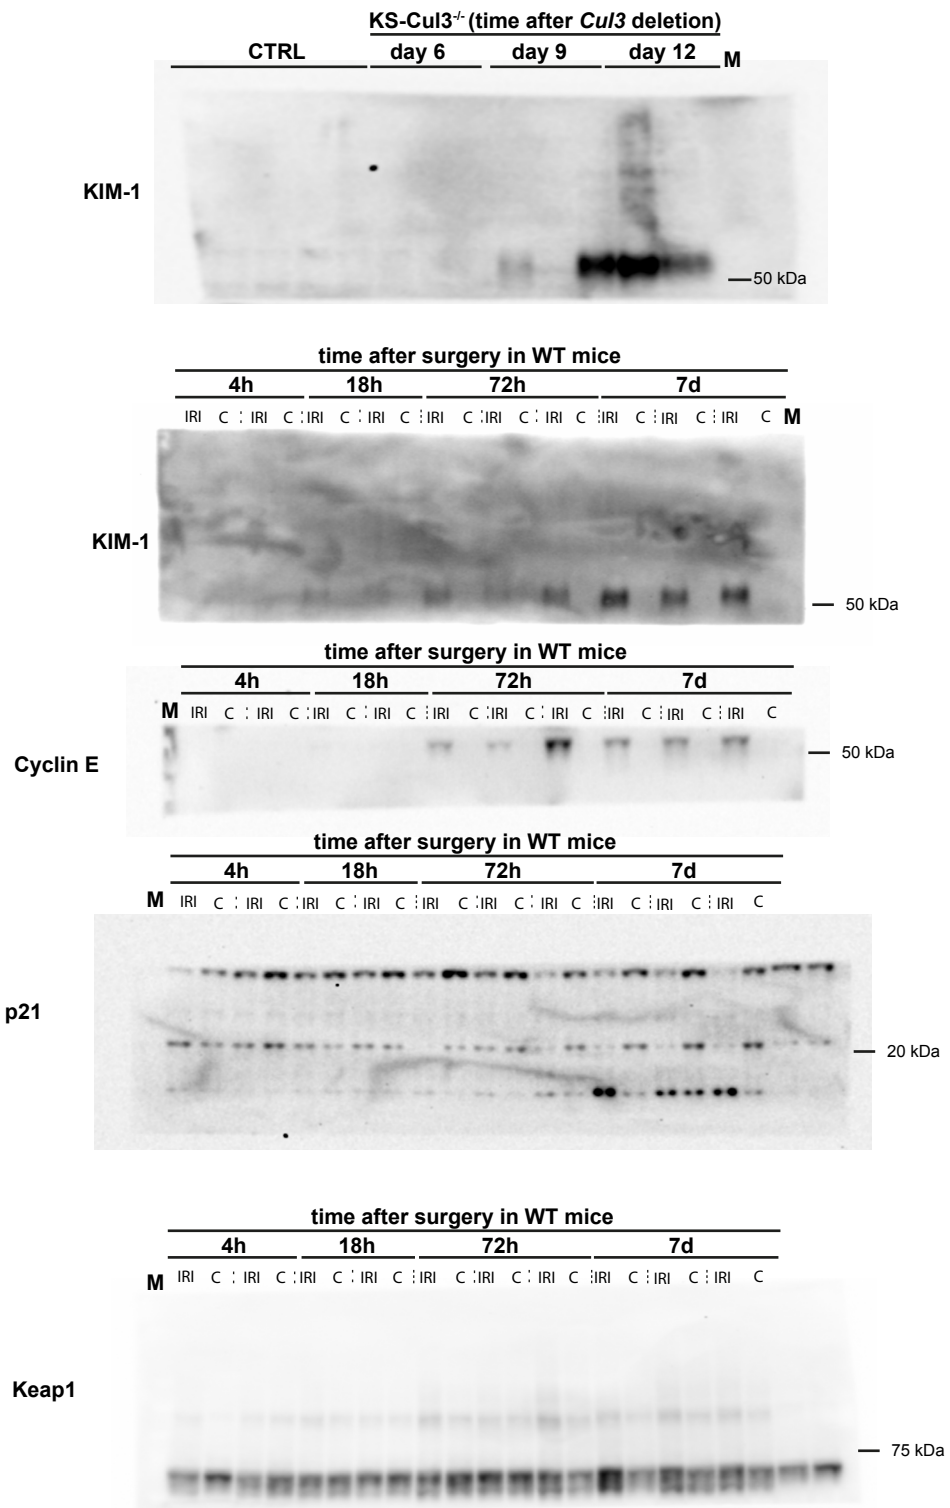

**Supplementary Figure S6. Uncropped Western blot gels shown in main manuscript Fig. 2.** M, marker (Precision Plus Protein™ Kaleidoscope™ Prestained Protein Standards); c or CTRL, control; IRI, ischemia-reperfusion injury; WT, wild-type.

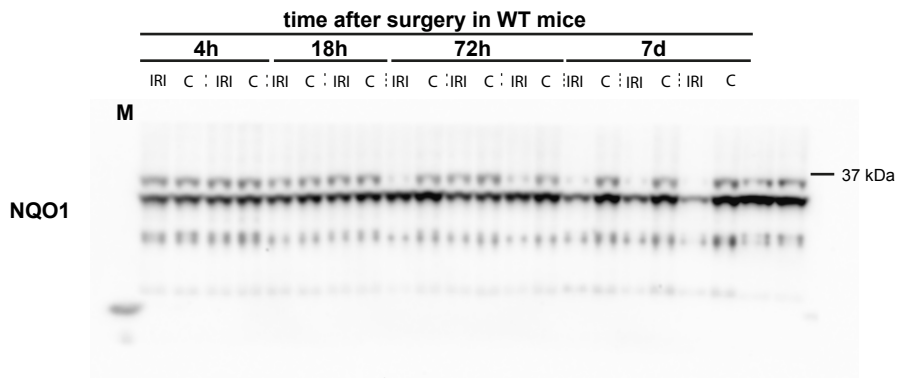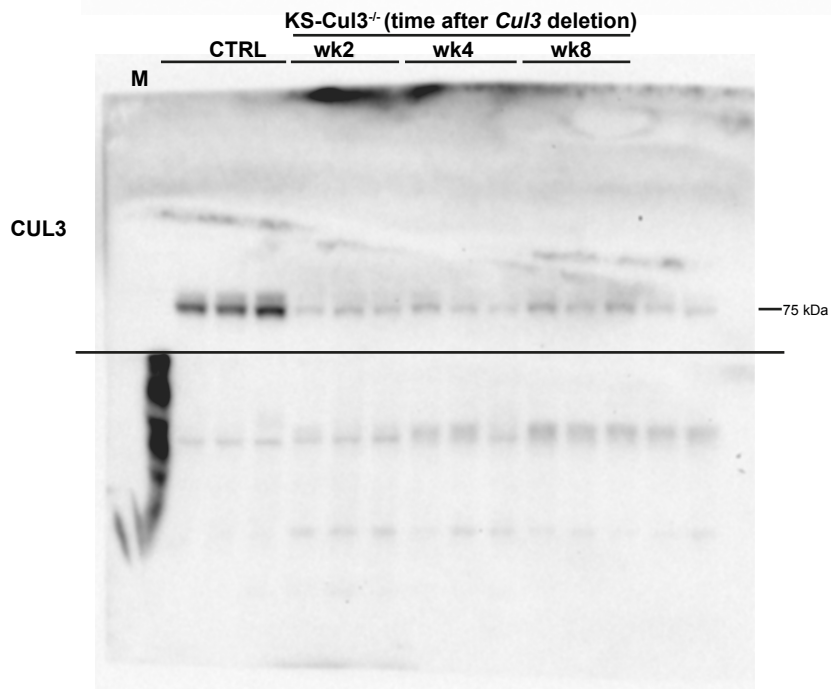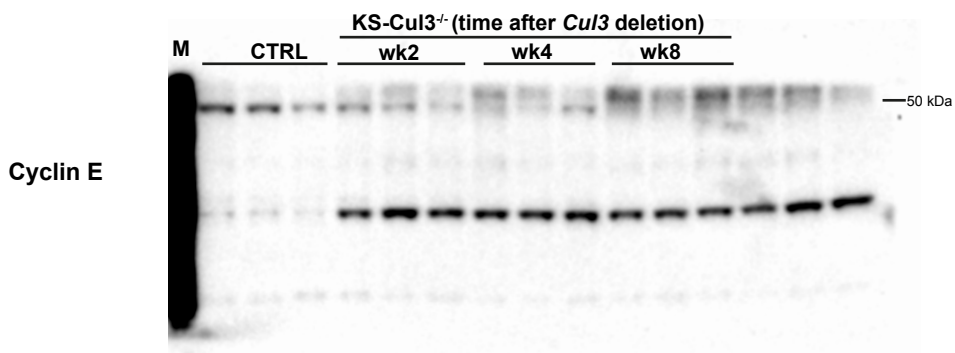

**Supplementary Figure S7. Uncropped Western blot gels shown in main manuscript Fig. 2, Fig. 3 and Fig. 4. M, marker (Precision Plus Protein™ Kaleidoscope™ Prestained Protein Standards); c or CTRL, control; IRI, ischemia-reperfusion injury; WT, wild-type; wk, week.**

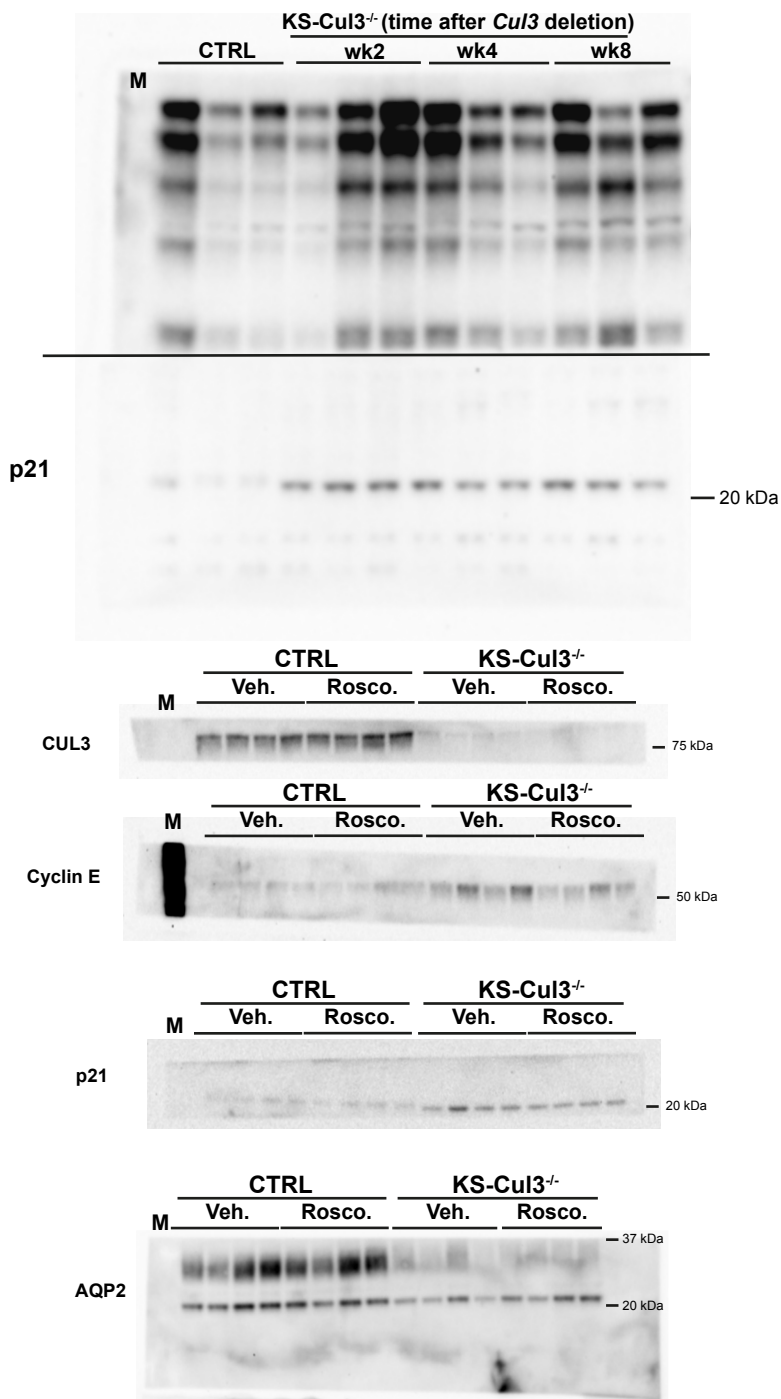

**Supplementary Figure S8. Uncropped Western blot gels shown in main manuscript Fig. 4 and Fig. 5.** M, marker (Precision Plus Protein™ Kaleidoscope™ Prestained Protein Standards); Veh., vehicle; Rosco., roscovitine; wk, week.

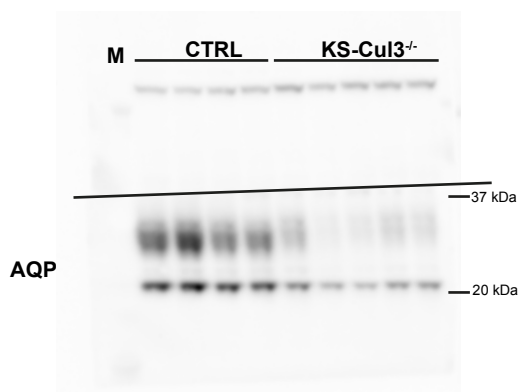

**Supplementary Figure S9. Uncropped Western blot gels shown in main manuscript Fig. 6.** M, marker (Precision Plus Protein™ Kaleidoscope™ Prestained Protein Standards); CTRL, control.



**Supplementary Table S1. List of reagents and resources used in this study.**

| Reagent or Resource                                  | Source, Catalog number                   | Dilution IF        | Dilution WB |
|------------------------------------------------------|------------------------------------------|--------------------|-------------|
| <b>Antibodies</b>                                    |                                          |                    |             |
| Mouse anti-BrdU antibody                             | Roche, Cat#11296736001                   | 1:120              |             |
| Rabbit anti-Cul3 antibody                            | Bethyl Laboratories, Cat#A301-109A       |                    | 1:2000      |
| Rabbit anti-Cul3 antibody                            | Sigma-Aldrich, Cat#C9745                 | 1:120; 1:100 (IHC) | 1:2000      |
| Goat anti-KIM-1 antibody                             | R&D, Cat#AF1817                          | 1:180              | 1:4000      |
| Rabbit anti-NGAL antibody                            | Abcam, Cat#ab63929                       | 1:200              |             |
| Mouse anti-F4/80 antibody                            | Santa Cruz Biotechnology, Cat#sc-377009  | 1:100              |             |
| Rabbit anti-CD3 antibody                             | Vector Laboratories, Cat#VP-RM01         | 1:500 (IHC)        |             |
| Rabbit anti-cleaved caspase-3                        | Cell signaling, Cat#9661S                | 1:120, 1:500 (IHC) |             |
| Mouse anti-pH3 antibody                              | Santa Cruz Biotechnology, Cat#sc-374669  | 1:200              |             |
| Rabbit anti-Ki-67                                    | Vector Laboratories, Cat#VP-RM04         | 1:120, 1:500 (IHC) |             |
| Rabbit anti-Cyclin E antibody                        | Singer JD et al., 1999                   |                    | 1:1000      |
| Rabbit anti-p21 (c19)                                | Santa Cruz Biotechnology, Cat#sc-397     |                    | 1:1000      |
| Anti-Actin, $\alpha$ -Smooth Muscle – Cy3            | Sigma Aldrich, Cat#C6198                 | 1:200              |             |
| Rabbit anti-Phospho-Histone H2A.X                    | Cell signaling, Cat#9718                 | 1:100              |             |
| Rabbit anti-pT96/T101-NKCC2                          | Saritas T et al., 2013                   | 1:4000             |             |
| Rat anti-Keap1                                       | Millipore Sigma, Cat#MABS514             |                    | 1:2000      |
| Rabbit anti-NQO1                                     | Abcam, Cat#ab34173                       |                    | 1:3000      |
| Goat anti-PCNA                                       | Sigma-Aldrich, Cat#SAB2502098            | 1:100              |             |
| Rabbit anti-PCNA                                     | Abcam, Cat#ab2426                        | 1:200              |             |
| Rat anti-CD44                                        | BD Biosciences Pharmingen, Cat#BD553131  | 1:200              |             |
| Goat anti-Aquaporin 2                                | Santa Cruz Biotechnology, Cat#sc-9882    | 1:1000             | 1:4000      |
| Rabbit anti-Collagen 1                               | Abcam, Cat#ab34710                       | 1:200              |             |
| Rabbit anti-Fibronectin                              | Abcam, Cat#ab23750                       | 1:200              |             |
| <b>Chemicals, Peptides, and Recombinant Proteins</b> |                                          |                    |             |
| Fluorescein labelled Lotus Tetragonolobus Lectin     | Vectorlabs, Cat#FL-1321                  | 1:200              |             |
| Coomassie G-250                                      | Bio-Rad, Cat#161-0786                    |                    |             |
| FITC-Sinistrin                                       | Fresenius-Kabi Austria                   |                    |             |
| Albuwell M                                           | Exocell, Cat#1011                        |                    |             |
| Doxycycline                                          | Alfa Aesar, Cat#J60579                   |                    |             |
| Antigen unmasking solution                           | Vector Laboratories, Cat#H-3300          |                    |             |
| DAPI mounting medium                                 | Thermo Fischer Scientific, Cat#P36971    |                    |             |
| Paraformaldehyde                                     | Thermo Fischer Scientific, Cat#O4042-500 |                    |             |
| Roscovitine                                          | Med Chem Express, Cat#HY-30237           |                    |             |
| DMSO                                                 | Sigma, Cat#D4540                         |                    |             |
| Poly(ethylene glycol) 300                            | Sigma, Cat#202371                        |                    |             |
| Avidin/Biotin blocking kit                           | Vector Laboratories, Cat#SP-2001         |                    |             |
| Peroxidase substrate kit                             | Vector Laboratories, Cat#SK-4100         |                    |             |
| Vectastain ABC Kit                                   | Vector Laboratories, Cat#PK-6100         |                    |             |

|                                           |                                                                                                                       |  |  |
|-------------------------------------------|-----------------------------------------------------------------------------------------------------------------------|--|--|
| Hydrogen peroxide                         | Thermo Fischer Scientific, Cat#H323                                                                                   |  |  |
| Methanol                                  | Thermo Fischer Scientific, Cat#A412                                                                                   |  |  |
| BSA                                       | Sigma-Aldrich, Cat#A7906                                                                                              |  |  |
| Sucrose                                   | Thermo Fischer Scientific, Cat#15503022                                                                               |  |  |
| EDTA                                      | Thermo Fischer Scientific, Cat#15576028                                                                               |  |  |
| EGTA                                      | Millipore Sigma, Cat#41-005-0GM                                                                                       |  |  |
| Sodium Orthovanadate                      | Millipore Sigma, Cat#508605                                                                                           |  |  |
| Sodium fluoride                           | Millipore Sigma, Cat#106450                                                                                           |  |  |
| Dithiothreitol                            | Millipore Sigma, Cat#20-265                                                                                           |  |  |
| Phenylmethane sulfonyl fluoride           | Millipore Sigma, Cat#7110-OP                                                                                          |  |  |
| Aprotinin                                 | Sigma-Aldrich, Cat#A6270                                                                                              |  |  |
| Leupeptin                                 | Thermo Fischer Scientific, Cat#78435                                                                                  |  |  |
| Western Lightning Plus ECL                | Perkin-Elmer, Cat#NEL103E001EA                                                                                        |  |  |
| Experimental Models: Organisms/Strains    |                                                                                                                       |  |  |
| Mouse: Pax8-rtTA/LC-Cul3 <sup>fl/fl</sup> | McCormick et al., 2014                                                                                                |  |  |
| Mouse: Cul3 <sup>flx</sup>                | The Jackson Laboratory, Stock No: 028349                                                                              |  |  |
| Mouse: C57BL/6J                           | The Jackson Laboratory, Stock No: 000664                                                                              |  |  |
| Software and Algorithms                   |                                                                                                                       |  |  |
| GraphPad Prism                            | <a href="https://www.graphpad.com/scientific-software/prism/">https://www.graphpad.com/scientific-software/prism/</a> |  |  |
| Other                                     |                                                                                                                       |  |  |
| Normal diet                               | Labdiet, Cat#5LOD                                                                                                     |  |  |
